# Supplementary material for: The Role of Glomerular Epithelial Injury in Kidney Function Decline in Patients With Diabetic Kidney Disease in the TRIDENT Cohort
Source: PubMed Central journal article supplement — Kidney Int Rep. 2021 Feb 3;6(4):1066–80. doi: 10.1016/j.ekir.2021.01.025 (PMC8071659; doi:10.1016/j.ekir.2021.01.025), 2021-02-03
Supplement: mmc1.pdf [file mmc1.pdf]

## Supplementary material

### Title: The role of glomerular epithelial injury in kidney function decline in patients with diabetic kidney disease in the TRIDENT cohort

**Running headline:** Pathological descriptors in patients with diabetes mellitus

**Authors:** Matthew B. Palmer<sup>1\*</sup>, Amin Abedini<sup>2,3\*</sup>, Casey Jackson<sup>2,3</sup>, Shira Blady<sup>2</sup>, Shatakshee Chatterjee<sup>2,3</sup>, Katie Marie Sullivan<sup>2,3</sup>, Raymond R. Townsend<sup>3</sup>, Jens Brodbeck<sup>4</sup>, Salem Almaani<sup>5</sup>, Anand Srivastava<sup>6</sup>, Rupali Avasare<sup>7</sup>, Michael J. Ross<sup>8</sup>, Amy K. Mottl<sup>9</sup>, Christos Argyropoulos<sup>10</sup>, Jonathan Hogan<sup>2</sup>, Katalin Susztak<sup>2,3</sup>.

#### Institutions:

##### \*Contributed equally

1. Department of Pathology and Laboratory Medicine, Department of Medicine, University of Pennsylvania, Perelman School of Medicine, Philadelphia, PA 19104, USA
2. Renal, Electrolyte, and Hypertension Division, Department of Medicine, University of Pennsylvania, Perelman School of Medicine, Philadelphia, PA 19104, USA
3. Institute of Diabetes Obesity and Metabolism, University of Pennsylvania, Perelman School of Medicine, Philadelphia, PA 19104, USA
4. Inflammation & Respiratory Therapeutics, Gilead Sciences Inc., Foster City, CA, United States
5. Division of Nephrology, The Ohio State University Wexner Medical Center, Columbus, OH, 43210, USA
6. Division of Nephrology and Hypertension, Center for Translational Metabolism and Health, Institute for Public Health and Medicine, Northwestern University Feinberg School of Medicine, Chicago, Illinois, USA
7. Department of Medicine, Nephrology, Oregon Health & Science University, Portland, OR, USA
8. Division of Nephrology, Albert Einstein College of Medicine/Montefiore Medical Center, Bronx, New York, USA
9. University of North Carolina Kidney Center, University of North Carolina at Chapel Hill, Chapel Hill, North Carolina, USA
10. Department of Internal Medicine, Division of Nephrology, University of New Mexico Health Sciences Center, Albuquerque, New Mexico, USA

#### Correspondence:

##### Katalin Susztak, MD, PhD

Professor of Medicine

University of Pennsylvania, Perelman School of Medicine

3400 Civic Center Blvd,

Smilow Translational building 12-123,

Philadelphia, PA 19104

Phone: (215) 898-2009

[ksusztak@penmedicine.upenn.edu](mailto:ksusztak@penmedicine.upenn.edu)

**Table of contents:**

**Supplementary Table S1.** Correlation analysis between pathological parameters and clinical characteristics.

**Supplementary Table S2.** Univariate Cox Proportional Hazard analysis of clinical and pathological findings in ESKD progression.

**Supplementary Table S1.** Correlation analysis between pathological parameters and clinical characteristics.

| <b>Variables</b>                                 |                    | <b>Age<br/>(yr)</b> | <b>Duration<br/>of DM<br/>(yr)</b> | <b>BMI-<br/>Baseline<br/>(Kg/m<sup>2</sup>)</b> | <b>SBP-<br/>Baseline<br/>(mmHg)</b> | <b>DBP-<br/>Baseline<br/>(mmHg)</b> | <b>HbA1C<br/>(%)</b> | <b>eGFR-<br/>Baseline<br/>(ml/min/1.73<br/>m<sup>2</sup>)</b> | <b>eGFR<br/>Change<br/>(%/yr)</b> | <b>UPCR-<br/>Baseline<br/>(mg/g)</b> | <b>UPCR<br/>fold<br/>change<br/>(/yr)</b> |
|--------------------------------------------------|--------------------|---------------------|------------------------------------|-------------------------------------------------|-------------------------------------|-------------------------------------|----------------------|---------------------------------------------------------------|-----------------------------------|--------------------------------------|-------------------------------------------|
| <b>KW nodules</b>                                | <b>r</b>           | -0.168              | 0.054                              | -0.072                                          | 0.046                               | -0.042                              | 0.031                | -0.249                                                        | -0.142                            | 0.338                                | -0.161                                    |
|                                                  | <b>P<br/>value</b> | 0.192               | 0.678                              | 0.578                                           | 0.72                                | 0.744                               | 0.811                | 0.051                                                         | 0.271                             | 0.007                                | 0.212                                     |
| <b>RPS DN Class</b>                              | <b>r</b>           | -0.152              | 0.043                              | -0.052                                          | 0.052                               | 0.116                               | 0.086                | -0.262                                                        | -0.234                            | 0.295                                | -0.022                                    |
|                                                  | <b>P<br/>value</b> | 0.239               | 0.74                               | 0.686                                           | 0.687                               | 0.37                                | 0.508                | 0.04                                                          | 0.067                             | 0.02                                 | 0.865                                     |
| <b>Segmental<br/>Sclerosis</b>                   | <b>r</b>           | 0.065               | 0.03                               | -0.291                                          | -0.022                              | 0.076                               | -0.243               | -0.031                                                        | -0.031                            | 0.237                                | 0.081                                     |
|                                                  | <b>P<br/>value</b> | 0.618               | 0.815                              | 0.022                                           | 0.864                               | 0.558                               | 0.057                | 0.809                                                         | 0.808                             | 0.064                                | 0.53                                      |
| <b>Global<br/>Sclerosis</b>                      | <b>r</b>           | -0.03               | 0.093                              | 0.008                                           | 0.115                               | 0.084                               | -0.049               | -0.339                                                        | -0.36                             | 0.271                                | 0.055                                     |
|                                                  | <b>P<br/>value</b> | 0.817               | 0.473                              | 0.951                                           | 0.374                               | 0.515                               | 0.704                | 0.007                                                         | 0.004                             | 0.033                                | 0.669                                     |
| <b>Glomerular<br/>Epithelial<br/>Hypertrophy</b> | <b>r</b>           | -0.177              | -0.021                             | -0.161                                          | 0.014                               | 0.002                               | -0.066               | 0.031                                                         | -0.159                            | 0.222                                | -0.089                                    |
|                                                  | <b>P<br/>value</b> | 0.169               | 0.871                              | 0.211                                           | 0.916                               | 0.987                               | 0.608                | 0.814                                                         | 0.217                             | 0.083                                | 0.489                                     |
| <b>Glomerular<br/>Epithelial<br/>Hyperplasia</b> | <b>r</b>           | -0.228              | 0.049                              | -0.145                                          | 0.091                               | 0.027                               | -0.014               | -0.058                                                        | -0.209                            | 0.204                                | 0.015                                     |
|                                                  | <b>P<br/>value</b> | 0.075               | 0.708                              | 0.261                                           | 0.482                               | 0.834                               | 0.913                | 0.655                                                         | 0.103                             | 0.112                                | 0.906                                     |
| <b>Mesangiolysis</b>                             | <b>r</b>           | -0.357              | -0.085                             | 0.073                                           | 0.155                               | 0.053                               | 0.152                | -0.181                                                        | -0.397                            | 0.503                                | -0.117                                    |
|                                                  | <b>P<br/>value</b> | 0.004               | 0.511                              | 0.57                                            | 0.228                               | 0.684                               | 0.239                | 0.16                                                          | 0.001                             | 0                                    | 0.366                                     |
| <b>Insudative<br/>Lesions</b>                    | <b>r</b>           | -0.207              | -0.046                             | 0.041                                           | 0.096                               | 0.085                               | 0.123                | -0.203                                                        | -0.385                            | 0.435                                | -0.062                                    |
|                                                  | <b>P<br/>value</b> | 0.107               | 0.722                              | 0.75                                            | 0.456                               | 0.513                               | 0.34                 | 0.114                                                         | 0.002                             | 0                                    | 0.635                                     |
| <b>Interstitial<br/>Fibrosis (%)</b>             | <b>r</b>           | -0.2                | 0.112                              | -0.104                                          | -0.011                              | 0.14                                | -0.006               | -0.392                                                        | -0.284                            | 0.265                                | 0.083                                     |
|                                                  | <b>P<br/>value</b> | 0.12                | 0.387                              | 0.421                                           | 0.934                               | 0.277                               | 0.964                | 0.002                                                         | 0.025                             | 0.037                                | 0.521                                     |

|                                      |                |        |        |        |        |        |        |        |        |        |        |
|--------------------------------------|----------------|--------|--------|--------|--------|--------|--------|--------|--------|--------|--------|
| <b>Interstitial Lymphocytes</b>      | <b>r</b>       | -0.153 | 0.164  | -0.17  | -0.048 | 0.053  | 0.131  | -0.378 | -0.22  | 0.235  | -0.045 |
|                                      | <b>P value</b> | 0.235  | 0.202  | 0.188  | 0.711  | 0.682  | 0.311  | 0.002  | 0.085  | 0.066  | 0.729  |
| <b>Arteriolar Hyalinosis</b>         | <b>r</b>       | -0.123 | 0.013  | 0.008  | 0.092  | -0.048 | 0.115  | -0.326 | -0.107 | 0.403  | -0.118 |
|                                      | <b>P value</b> | 0.34   | 0.923  | 0.951  | 0.479  | 0.713  | 0.374  | 0.01   | 0.407  | 0.001  | 0.359  |
| <b>Intimal Fibrosis</b>              | <b>r</b>       | 0.228  | 0.012  | -0.028 | 0.36   | -0.145 | 0.05   | -0.322 | -0.05  | 0.501  | -0.232 |
|                                      | <b>P value</b> | 0.075  | 0.927  | 0.83   | 0.004  | 0.26   | 0.698  | 0.011  | 0.699  | 0      | 0.069  |
| <b>Average GBM Thickness (nm)</b>    | <b>r</b>       | -0.143 | -0.175 | -0.004 | -0.071 | -0.02  | -0.066 | 0.063  | -0.2   | 0.33   | -0.13  |
|                                      | <b>P value</b> | 0.269  | 0.174  | 0.975  | 0.581  | 0.875  | 0.608  | 0.626  | 0.119  | 0.009  | 0.312  |
| <b>GBM Lamina Densa Remodeling</b>   | <b>r</b>       | 0.075  | 0.139  | -0.19  | 0.056  | -0.051 | -0.086 | -0.18  | 0.094  | -0.143 | 0.188  |
|                                      | <b>P value</b> | 0.561  | 0.281  | 0.139  | 0.667  | 0.694  | 0.504  | 0.161  | 0.468  | 0.269  | 0.143  |
| <b>GBM Duplication</b>               | <b>r</b>       | -0.068 | 0.139  | -0.025 | 0.162  | -0.019 | -0.214 | -0.003 | -0.232 | 0.174  | 0.086  |
|                                      | <b>P value</b> | 0.598  | 0.283  | 0.847  | 0.21   | 0.882  | 0.094  | 0.981  | 0.07   | 0.176  | 0.507  |
| <b>Average FPW (µm)</b>              | <b>r</b>       | 0.019  | -0.093 | 0.009  | 0.033  | 0.087  | -0.113 | -0.03  | -0.254 | 0.374  | -0.066 |
|                                      | <b>P value</b> | 0.885  | 0.474  | 0.946  | 0.798  | 0.5    | 0.382  | 0.817  | 0.047  | 0.003  | 0.609  |
| <b>Foot Process Effacement (%)</b>   | <b>r</b>       | 0.071  | 0.122  | -0.15  | 0.005  | -0.073 | -0.184 | -0.112 | -0.157 | 0.371  | -0.012 |
|                                      | <b>P value</b> | 0.585  | 0.346  | 0.246  | 0.968  | 0.572  | 0.152  | 0.386  | 0.222  | 0.003  | 0.924  |
| <b>Endothelial Fenestration Loss</b> | <b>r</b>       | 0.061  | 0.045  | -0.202 | 0.12   | -0.087 | 0.172  | -0.217 | -0.105 | 0.109  | 0.03   |
|                                      | <b>P value</b> | 0.64   | 0.731  | 0.115  | 0.354  | 0.501  | 0.18   | 0.091  | 0.417  | 0.401  | 0.815  |
| <b>Mesangial Hyaline</b>             | <b>r</b>       | -0.118 | 0.083  | -0.219 | -0.036 | 0.047  | -0.131 | -0.286 | -0.109 | 0.173  | 0.265  |

|                  | <b>P</b>     |       |       |       |        |       |       |        |        |       |       |
|------------------|--------------|-------|-------|-------|--------|-------|-------|--------|--------|-------|-------|
|                  | <b>value</b> | 0.359 | 0.524 | 0.087 | 0.782  | 0.715 | 0.311 | 0.024  | 0.399  | 0.18  | 0.037 |
| <b>Mesangial</b> | <b>r</b>     |       |       |       |        |       |       |        |        |       |       |
| <b>Matrix</b>    |              |       |       |       |        |       |       |        |        |       |       |
| <b>Increase</b>  |              | -0.15 | 0.114 | 0.041 | -0.012 | -0.1  | 0.061 | -0.199 | -0.077 | 0.353 | 0.006 |
|                  | <b>P</b>     |       |       |       |        |       |       |        |        |       |       |
|                  | <b>value</b> | 0.244 | 0.378 | 0.753 | 0.929  | 0.442 | 0.637 | 0.121  | 0.552  | 0.005 | 0.961 |

Descriptors are shown by different colors: Glomerular-LM descriptors (red), interstitial descriptors (blue), vasculature descriptors (yellow), and glomerular-EM descriptors (green). Correlation analysis was performed using Spearman test. KW nodules; Kimmelsteil-Wilson nodules, RPS DN class; Renal Pathology Society diabetic nephropathy class, GBM; glomerular basement membrane, FPW; foot process width.

**Supplementary Table S2.** Univariate Cox Proportional Hazard analysis of clinical and pathological findings in ESKD progression.

| Variables                                       | HR    | 95%CI       | P value      | P value for the proportionality of Cox model |
|-------------------------------------------------|-------|-------------|--------------|----------------------------------------------|
| <b>Age</b>                                      | 0.97  | 0.94-1.01   | 0.22         | 0.93                                         |
| <b>Gender</b>                                   |       |             |              |                                              |
| Female                                          | Ref   | -           | -            |                                              |
| Male                                            | 1.1   | 0.38-3.14   | 0.85         | 0.42                                         |
| <b>Race</b>                                     |       |             |              |                                              |
| Non-AA                                          | Ref   | -           | -            |                                              |
| AA                                              | 0.77  | 0.27-2.21   | 0.63         | 0.67                                         |
| <b>Duration of DM (yr)</b>                      | 1.01  | 0.97-1.05   | 0.57         | 0.86                                         |
| <b>HbA1C (%)</b>                                | 1.16  | 0.88-1.54   | 0.28         | 0.29                                         |
| <b>eGFR-Baseline (ml/min/1.73m<sup>2</sup>)</b> | 0.94  | 0.9-0.98    | <b>0.006</b> | <b>0.002</b>                                 |
| <b>UPCR-Baseline (mg/g)</b>                     | 1.04  | 1.01-1.08   | <b>0.007</b> | 0.16                                         |
| <b>Glomerular Epithelial Hyperplasia</b>        |       |             |              |                                              |
| 0                                               | Ref   | -           | -            |                                              |
| 1                                               | 4.77  | 1.68-13.55  | <b>0.003</b> | 0.68                                         |
| <b>Interstitial Fibrosis (%)</b>                |       |             |              |                                              |
| 0-25                                            | Ref   | -           | <b>0.005</b> |                                              |
| 25-50                                           | 0.18  | 0.01-2.09   | 0.17         | 0.34                                         |
| 50-75                                           | 1.85  | 0.37-9.2    | 0.45         |                                              |
| 75-100                                          | 5.37  | 1.12-25.68  | <b>0.03</b>  |                                              |
| <b>GBM Lamina Densa Remodeling</b>              |       |             |              |                                              |
| 0                                               | Ref   | -           | -            |                                              |
| 1                                               | 0.24  | 0.06-0.91   | <b>0.03</b>  | 0.1                                          |
| 2                                               | -     | -           | 0.98         |                                              |
| 3                                               | -     | -           | 0.93         |                                              |
| <b>Clusters</b>                                 |       |             |              |                                              |
| 1                                               | Ref   | -           | <b>0.02</b>  |                                              |
| 2                                               | 17.89 | 2.13-149.79 | <b>0.008</b> | 0.43                                         |
| 3                                               | 9.81  | 1.25-76.79  | <b>0.03</b>  |                                              |

All pathological descriptors as well as clusters were examined using cox proportional hazard analysis; however, only significant associations are shown in the table. Baseline demographic and clinical features are shown in the table as well, because they were used for adjustment in the final model except eGFR-baseline due to lack of Cox proportionality. HR; hazard ratio, CI; confidence interval, AA; African-American, DM; diabetes mellitus, HbA1C; hemoglobin A1C, eGFR; estimated glomerular filtration rate, UPCR; urine protein to creatinine ratio, GBM; glomerular basement membrane.
